# Supplementary material for: Overexpression of Rice BSR2 Confers Disease Resistance and Induces Enlarged Flowers in Torenia fournieri Lind
Source: MDPI journal article supplement (doi:10.3390/ijms23094735), 2022-04-25
Supplement: s1 [file s1]

(a)

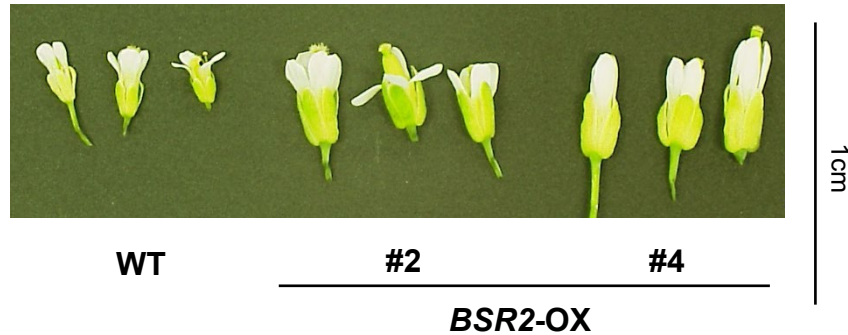

(b)

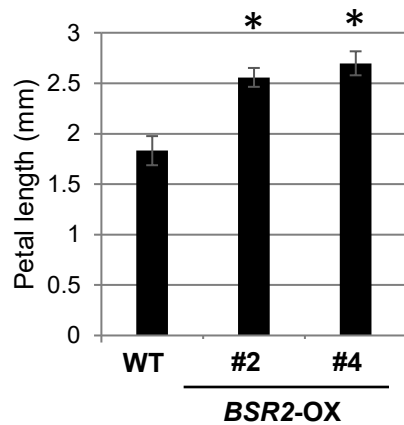

(c)

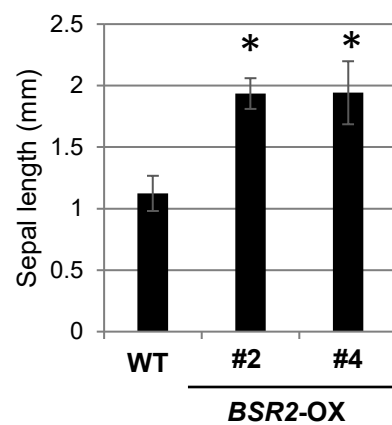

(d)

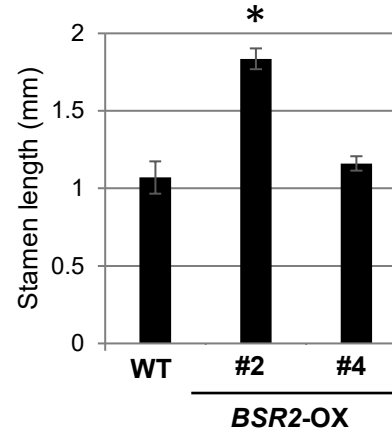

(e)

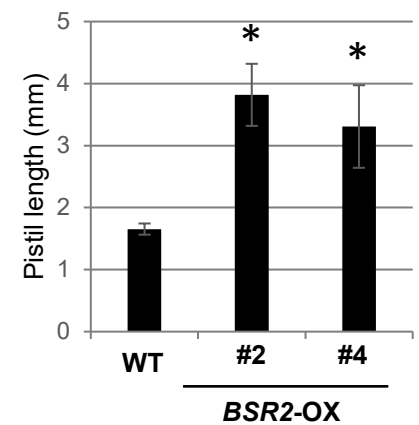

**Figure S1.** Comparison of flowers and floral organs between WT and *BSR2*-OX *Arabidopsis* lines. (a) Comparison of flowers between WT and *BSR2*-OX lines, 4 days after flowering. Comparison of longitudinal lengths of (b) petals, (c) sepals, (d) stamens, and (e) pistils, 4 days after flowering. Error bars represent standard deviations ( $n = 4-6$ ). \*values significantly different from that in WT (\* $P < 0.05$ ; Dunnett's tests).

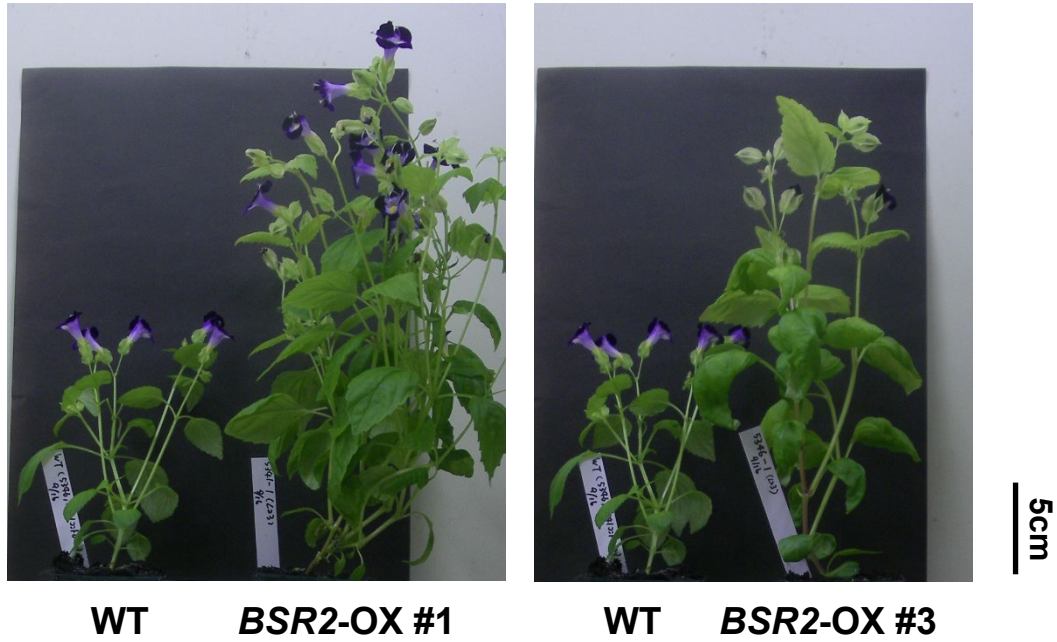

**Figure S2.** Comparison of adult whole plants 70 days after propagation by cutting.

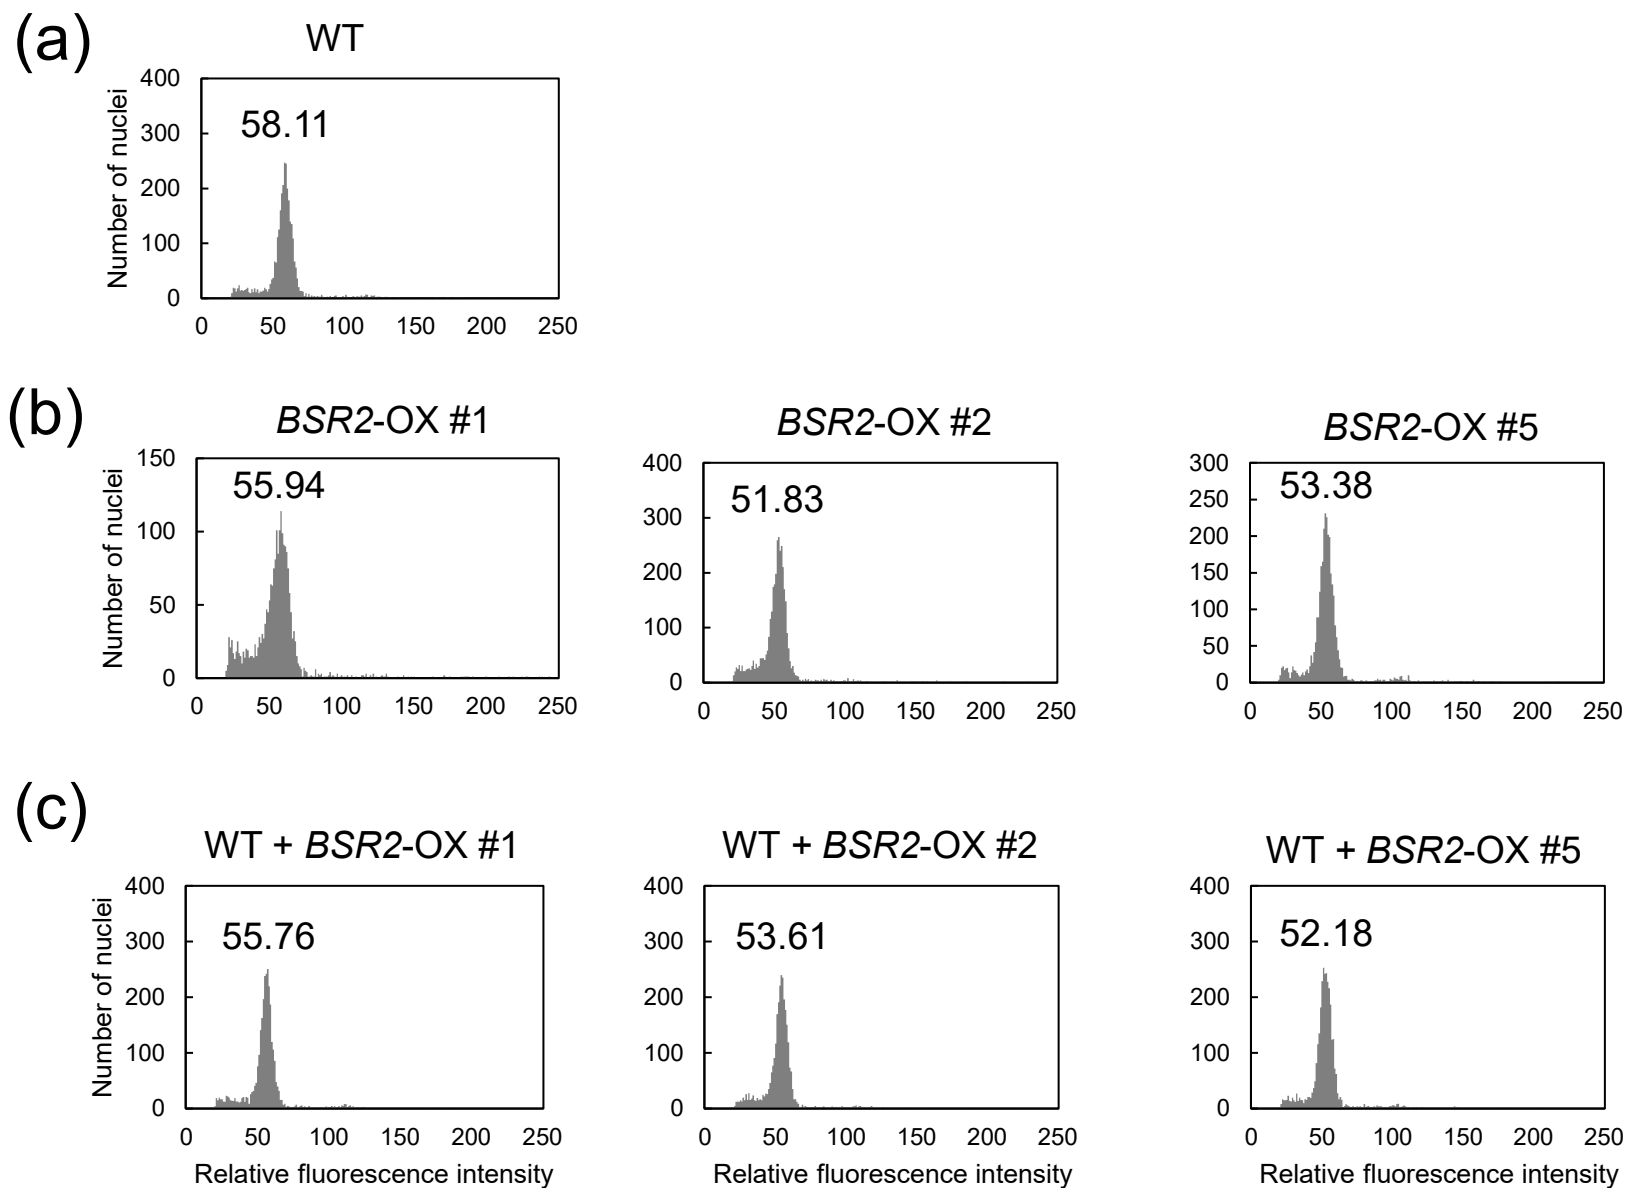

**Figure S3.** Typical flow cytometry histograms for nuclei isolated from leaves of torenia. (a) WT. (b) Representative *BSR2*-OX lines. (c) Mixture of an equal amount of WT and representative *BSR2*-OX lines. Number represents the mean value at the main (2C) peak.
